# Supplementary material
Source: PubMed Central journal article supplement (PMC3384192)
Supplement: 1118715109_pnas.201118715SI.pdf [file 1118715109_pnas.201118715SI.pdf]

# Supporting Information

Macdonald et al. 10.1073/pnas.1118715109

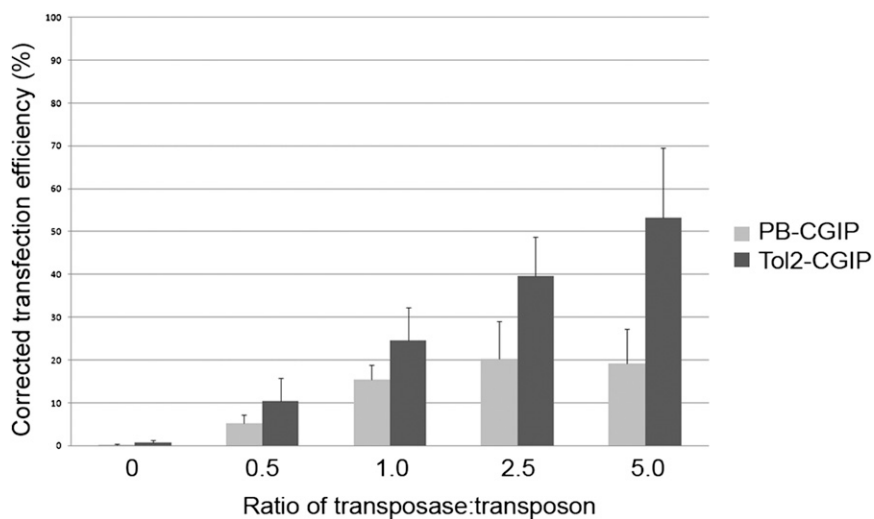

**Fig. S1.** Increased ratios of DNA transposase increase the stable transfection rates in DF-1 cells. DF-1 cells were transfected with 1.0  $\mu\text{g}$  of a PB-CGIP or a Tol2-CGIP vector and increasing amounts (micrograms) of the appropriate DNA transposon and assayed 3 wk after transfection for GFP expression by flow cytometry. All transfection contained equal total amounts of plasmid DNA. Data represent three independent experiments. The stable transfection efficiencies are corrected for the initial rate of transfection. Error bars, SEM.

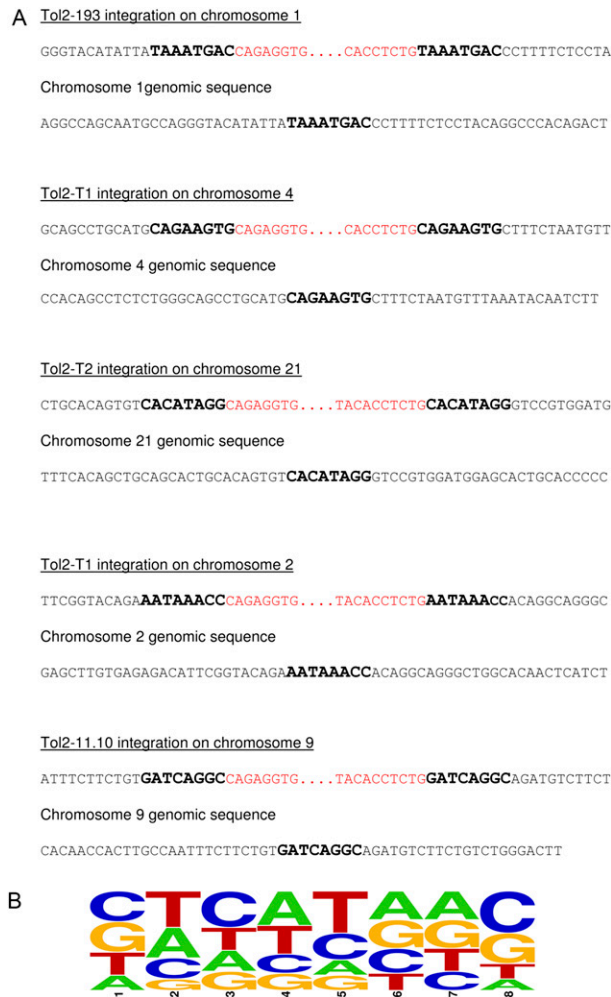

**Fig. S2.** Tol2 integration sites in the genome of PGCs. (A) Five transposon–genomic junction fragments were identified on both sides of the Tol2 transposon, using inverse PCR. The PGC transfection identification number for each insert is given. Red, Tol2 ITRs; boldface type, 8-bp duplication. (B) The 8 bp flanking the integration sites for the Tol2 CGIP transposon were analyzed using WebLogo display (1) to generate a graphical representation of the nucleotide frequency at the integration site.

1. Crooks GE, Hon G, Chandonia JM, Brenner SE (2004) WebLogo: A sequence logo generator. *Genome Res* 14:1188–1190.

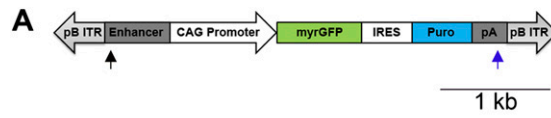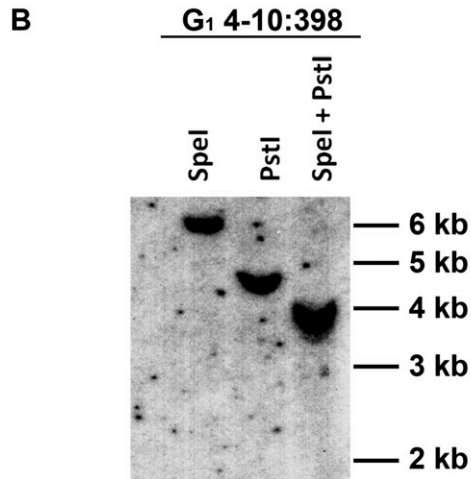

**Fig. S3.** Southern blot analysis of genomic DNA from a transgenic G<sub>1</sub> chicken. (A) Diagram of the piggyBac PB-CmyrGIP vector. The restriction sites for SpeI (black arrow) and PstI (blue arrow) are indicated. (B) Genomic DNA from the blood of a G<sub>1</sub> offspring (4-10:398) was analyzed for presence and copy number of the piggyBac transposon by digestion with SpeI or PstI to generate junction fragments and SpeI and PstI to release an internal transposon fragment. The Southern blot was hybridized with a DNA probe to the GFP sequence. The single bands indicate that a single integration event occurred.

**Table S1. Tol2 chromosomal integration sites**

| PGC experiment                     | Restriction enzyme | Insertion position in<br>boldface type,<br>transposon ITR | Insertion site          | Chromosome | Gene name/<br>Ensembl ID/EST   |
|------------------------------------|--------------------|-----------------------------------------------------------|-------------------------|------------|--------------------------------|
| <b>5' Tol2 integration mapping</b> |                    |                                                           |                         |            |                                |
| Tol2-T1                            | Alul               | ATTCGGTACAGAAATAAACC <b>CAG</b> , 141,374,821             | Intron                  | 2          | EXT1 (ENSGALT00000025965)      |
| Tol2-T1                            | HaeIII             | AAGTTCAAAGTTATATTAGCC <b>CAG</b> , 96,237,040             | Intron                  | 3          | EST BX269199                   |
| Tol2-T1                            | PsiI               | GCAGCCTGCATGCAGAAAGTGC <b>CAG</b> , 22,273,235            | Intron                  | 4          | PDGFc (ENSGALT00000015275)     |
| Tol2-T2                            | Alul               | ACTGCACAGTGTACATAGGC <b>CAG</b> , 783,547                 | Flanking                | 21         | EST CO421607                   |
| Tol2-T2                            | Alul               | ATTAGAGACCTCTTCTGCC <b>CAG</b> , 29,873,784               | Intron                  | 4          | EST BU218066                   |
| Tol2-T2                            | HaeIII             | CGCTTTGGGAGTTGCGATCC <b>CAG</b> , 104,243,072             | Flanking                | 1          | EST CO761385                   |
| Tol2-193                           | Alul               | CCCAAATCTGAGGAGACAG <b>CAG</b> , 95,262,451               | Intergenic <sup>†</sup> | 2          |                                |
| Tol2-193                           | Alul               | GGGTACATATTATAAATGACC <b>CAG</b> , 179,487,746            | Intron                  | 1          | EST DN851336                   |
| Tol2-193                           | Alul               | AAGCCGATCATCAGTATCTCC <b>CAG</b> , 51,020,236             | Exon                    | 3          | ESR1 (ENSGALT00000021168)      |
| Tol2-193                           | HaeIII             | GCACAAGTCTCGCTCCCTGCC <b>CAG</b> , 365,742                | Intron                  | 26         | PTPN7 (ENSGALT00000000839)     |
| Tol2-193                           | HaeIII             | TGGTCCCTCATGGTCAGAGCC <b>CAG</b> , 348,960                | Intron                  | 28         | FBN2 (ENSGALT00000000433)      |
| Tol2-11.10                         | Alul               | AATTTCTTCTGTGATCAGGCC <b>CAG</b> , 11,255,883             | Intergenic*             | 9          |                                |
| Tol2-11.10                         | HaeIII             | TTCCCTCAGCCGCTTCCCAT <b>CAG</b> , 118,415,627             | Intron                  | 2          | EST BU265869                   |
| Tol2-11.10                         | HaeIII             | GCGTGGTATGCCCAATTCACC <b>CAG</b> , 115,800,237            | Intergenic*             | 1          |                                |
| Tol2-11.10                         | PsiI               | TGATCCCTGGGGAACACCC <b>CAG</b> , 73,330,982               | Intergenic*             | Z          | EST DN928593                   |
| Tol2-11.10                         | PsiI               | ACTCAAATGCACAATAACGC <b>CAG</b> , 63,936,395              | Flanking                | 3          | SERINC1 (ENSGALT00000023989)   |
| Tol2-25.11                         | PsiI               | TAGCTATAGAGAGCTATAGGC <b>CAG</b> , 71,482,703             | intergenic <sup>†</sup> | Z          |                                |
| Tol2-25.11                         | PsiI               | ATATTTTATCCTTACCTGCT <b>CAG</b> , 26,588,210              | intron                  | Z          | DOCK8 (ENSGALT00000038450)     |
| Tol2-c8                            | Alul               | TAATAGCCCATAGGATGCGG <b>CAG</b> , 10,380,102              | Flanking                | 14         | TMEM114 (ENSGALT00000011882)   |
| Tol2-c8                            | HaeIII             | AAAGGCATATGGCACTGCAT <b>CAG</b> , 65,834,417              | Intron                  | 2          | RREBP1 EST BU405399            |
| Tol2-c8.1                          | HaeIII             | AGCCATCCCTAAGCTGCATGC <b>CAG</b> , 646,187                | Flanking                | 2          | EST AJ454197                   |
| Tol2-c8.1                          | PsiI               | AGAGTAAAAATTATTAGTACC <b>CAG</b> , 2,010,484              | Intron                  | 26         | ELK4 (ENSGALT00000000994)      |
| Tol2-c8.2                          | HaeIII             | AGAGCAGCTCAGCTATTTCC <b>CAG</b> , 24,173,347              | Intron                  | 7          | TNS1 (ENSGALT00000038183)      |
| Tol2-c8.2                          | HaeIII             | ACGGAGGGTGAGGAAACGAG <b>CAG</b>                           | Intron                  | Un         | SRCIN1 ENSGALT00000015804      |
| Tol2-c8.3                          | PsiI               | AGAGGGCGGGTTGGCATGG <b>CAG</b> , 85,037,711               | Intergenic*             | 3          |                                |
| Tol2-c8.3                          | PsiI               | CATATTAGCTCTATAATGGG <b>CAG</b> , 41,755,050              | Intron                  | Z          | Cdc14B (ENSGALT00000020613)    |
| Tol2-c8.3                          | PsiI               | TTACTGTGGTACTTTCCAT <b>CAG</b> , 14,496,226               | Intron                  | 14         | IFT140 (ENSGALT00000015164)    |
| Tol2-c8.3                          | PsiI               | ACTGTTAGATCACACAGC <b>CAG</b> , 62,015,773                | Intron                  | Z          | LOC427324 (ENSGALT00000025177) |
| <b>3' Tol integration mapping</b>  |                    |                                                           |                         |            |                                |
| Tol2-T2                            | Alul               | TCTGGAGCCCCATAACATTTAGAG, 6,138,933                       | Flanking                | 20         | EST AJ399365                   |
| Tol2-T2                            | HaeIII             | TCTGCCAGCAGCTCAGGGTGCCCA,<br>130,611,961                  | Intron                  | 2          | TMEM67 (ENSGALT00000025689)    |
| Tol2-T2                            | HindIII            | TCTGCTATTATAAAAAAATAGACC                                  | Flanking                | Un         | ALOXE3 (ENSGALT00000021689)    |
| Tol2-193                           | Alul               | TCTGTTTCATCTGTACCTGTGAT, 63,331,450                       | Flanking                | 4          | EST DR418323                   |
| Tol2-193                           | HindIII            | TCTGCCTGCTCGATGCCCGCAGG, 3,943,565                        | Exon                    | 26         | DEF6 (ENSGALT00000004117)      |
| Tol2-193                           | HindIII            | TCTGTCAGTCACTCTCATCGTGA, 65,222,883                       | Intron                  | 3          | MAN1A1 (ENSGALT00000037376)    |
| Tol2-11.10                         | HaeIII             | TCTGCAGGAGACCGCCGGCTGCCT, 4,548,348                       | Intron                  | 7          | IL28 (ENSGALT00000006043)      |
| Tol2-11.10                         | HaeIII             | TCTGCATTTTCGAGATGCTGTAAG, 27,384,165                      | Intron                  | 7          | GLI3 (ENSGALT00000018998)      |
| Tol2-11.10                         | HindIII            | TCTGGTGCTTTTGTGCTGGGG, 3,833,736                          | Intron                  | 28         | mRNA BX929812                  |
| Tol2-11.10                         | HindIII            | TCTGTGGAAGACATCAGGCAGAGT, 24,922,038                      | Flanking                | 5          | C1QTNF4 (ENSGALT00000013115)   |
| Tol2-16.11                         | HindIII            | TCTGCCTCTGCGTTCAGGGTGCCA, 6,285,333                       | Flanking                | 17         | USP20 (ENSGALT00000006585)     |
| Tol2-16.11                         | HindIII            | TCTGCCCTTGATATTTAGGGAAGC, 3,654,975                       | Intron                  | 6          | GLUD1 (ENSGALT00000003144)     |
| Tol2-25.11                         | HaeIII             | TCTGTCCGCAGCCATACTACAGC, 17,654,237                       | Flanking                | 13         | UQCRQ (ENSGALT00000011489)     |
| Tol2-25.11                         | HindIII            | TCTGTTTCATTTGCAGTATTCCTGGC, 626,147                       | Intron                  | 22         | EBF2 (ENSGALT00000000321)      |
| Tol2-25.11                         | HindIII            | TCTGGTGCCGGTGCAATGAATTTT, 19,486,141                      | Intergenic <sup>†</sup> | 8          |                                |
| Tol2-c8                            | HaeIII             | TCTGATCTACACCCACAAACTA, 54,541,392                        | Intergenic*             | 5          |                                |
| Tol2-c8                            | HindIII            | TCTGTGTGTCAGGGGAGGTTCAAG, 3,610,251                       | Flanking                | 2          | mRNA CR524032                  |
| Tol2-c8.1                          | HaeIII             | TCTGAGGGCAACGTGGGAATAGTG,<br>13,621,982                   | Flanking                | 1          | EST BU423113                   |
| Tol2-c8.2                          | HaeIII             | TCTGTGCTTTTGTAGCATTGCGCT                                  | Intergenic*             | Un         | CN237546                       |
| Tol2-c8.2                          | HaeIII             | TCTGGTGTGGTGTCTTAGCAGGTA, 52,906,872                      | Flanking                | 5          | EST CN235218                   |
| Tol2-c8.2                          | HaeIII             | TCTGTTTAGAAGCTATGAAGGTGC, 70,380,681                      | Intron                  | 2          | RNASEN (ENSGALT00000021065)    |
| Tol2-c8.2                          | HaeIII             | TCTGCTCTGAGCACAGAATGCCAC, 21,167,669                      | Intron                  | 10         | MAP2K5 (ENSGALT00000012883)    |

Tol2 transposition integration sites were mapped using inverse PCR from 10 independent transposition experiments, using two PGC lines. Un: virtual chromosome constructed from unanchored contigs. Flanking: 0.2–9 kb to nearest transcript.

\*More than 9 kb to nearest transcript.

<sup>†</sup>More than 30 kb to nearest transcript.
